# Supplementary material
Source: PubMed Central journal article supplement (PMC5501173)

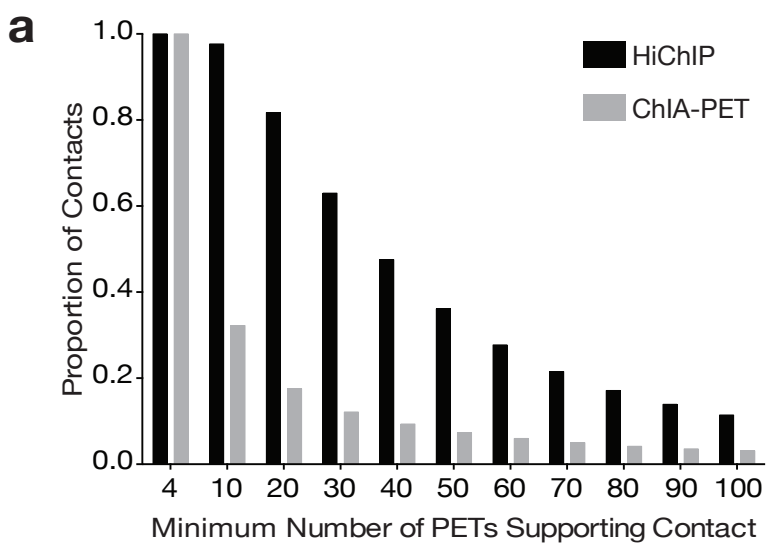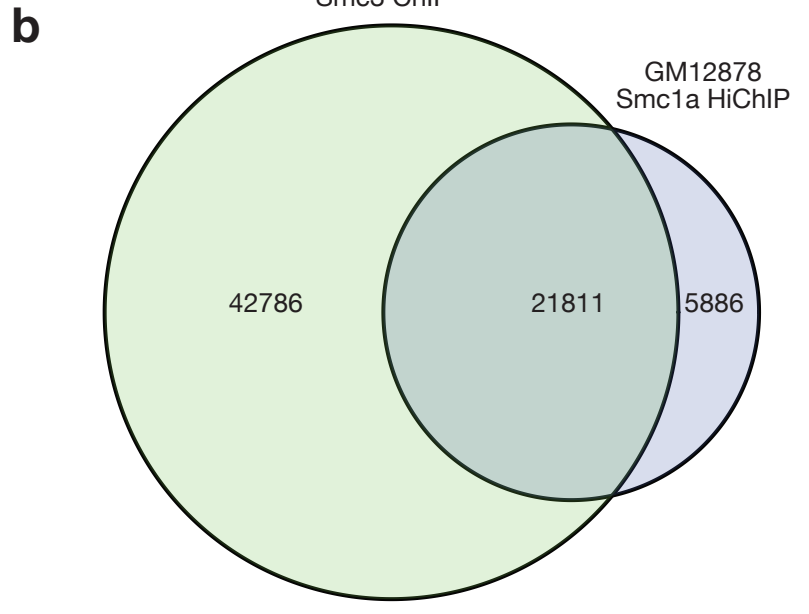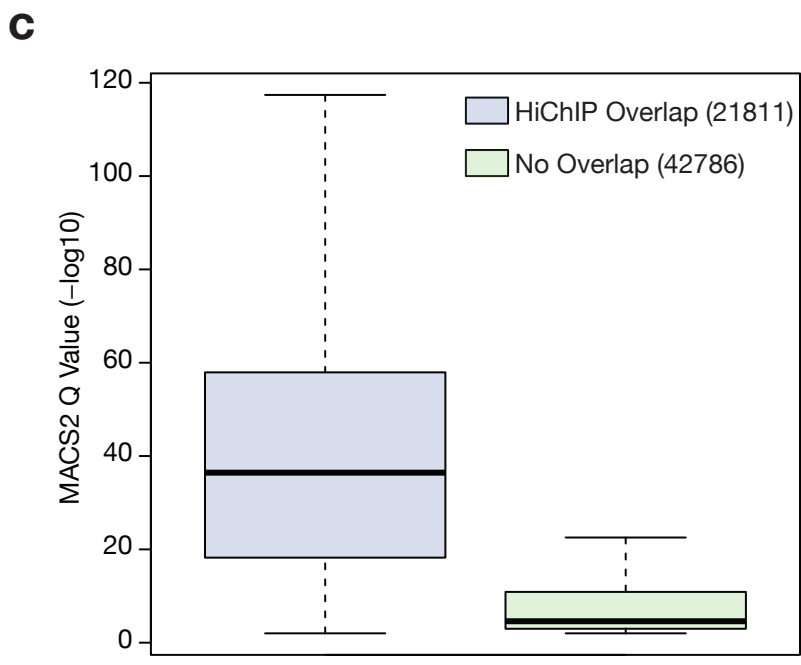

Supplement: NIHMS872416-supplement-S__Figure_1.pdf [file NIHMS872416-supplement-S__Figure_1.pdf]

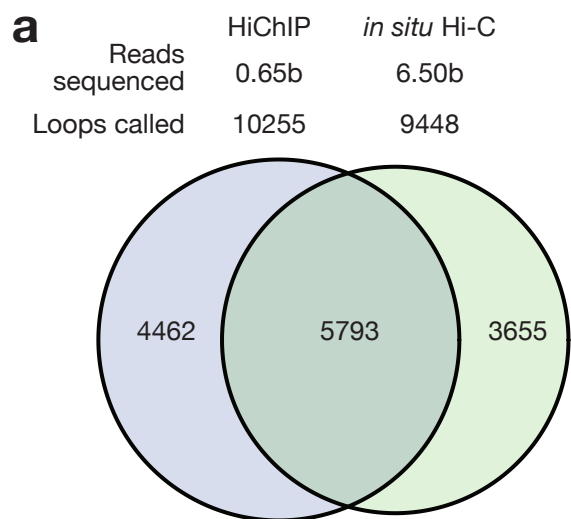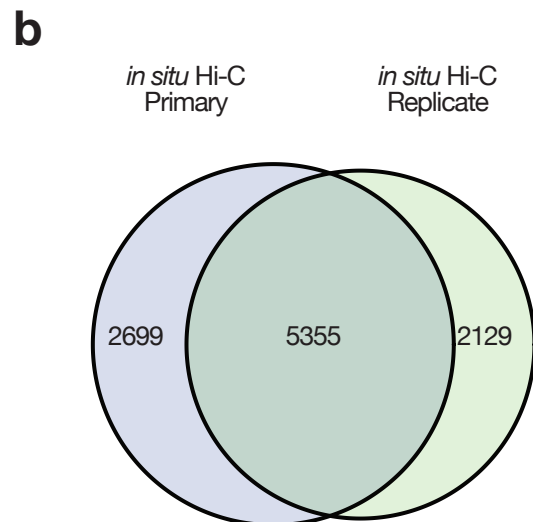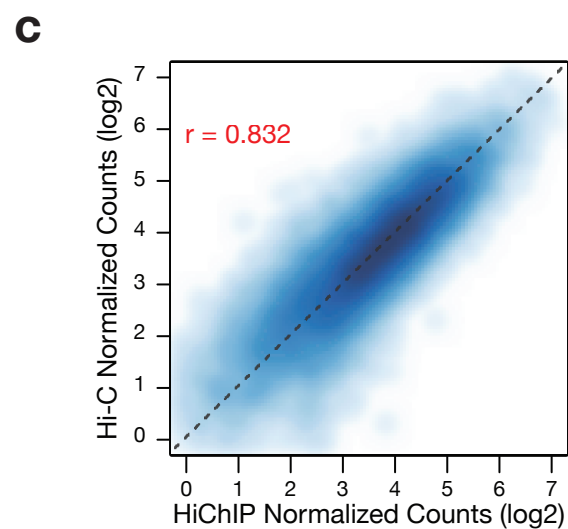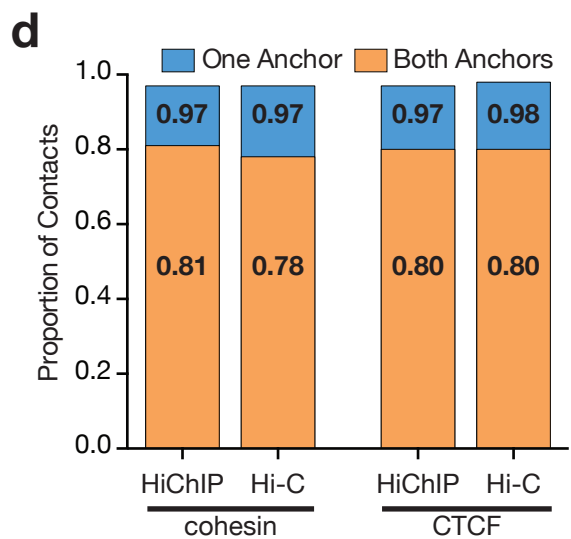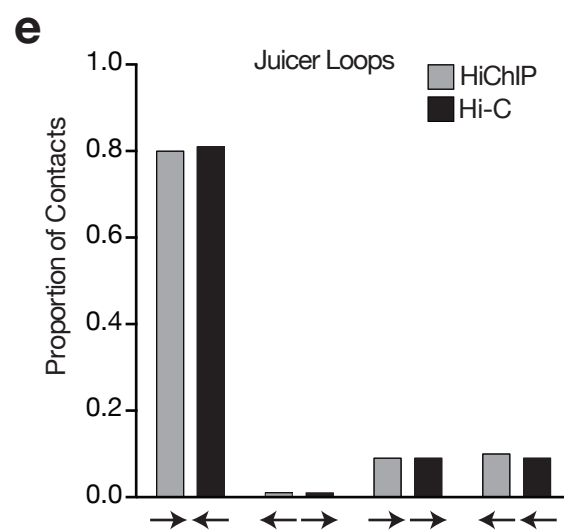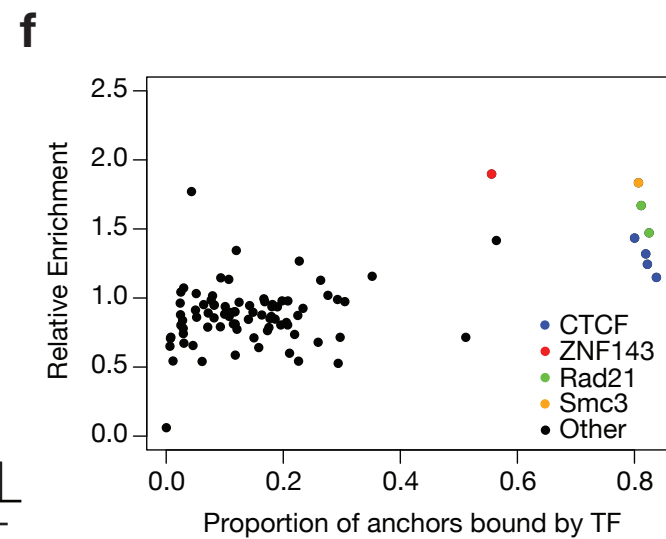

Supplement: NIHMS872416-supplement-S__Figure_2.pdf [file NIHMS872416-supplement-S__Figure_2.pdf]

**a**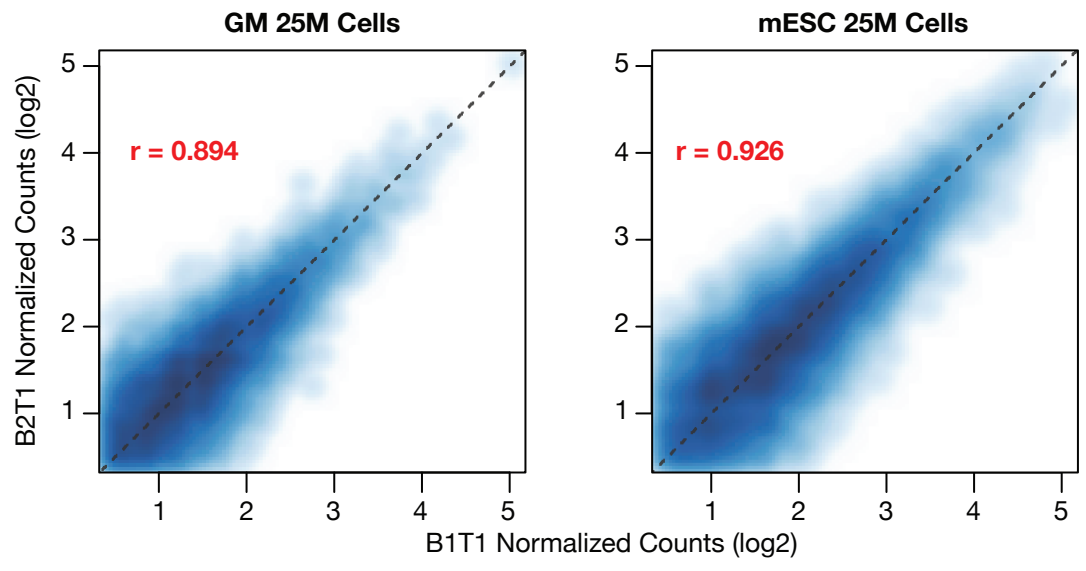**b**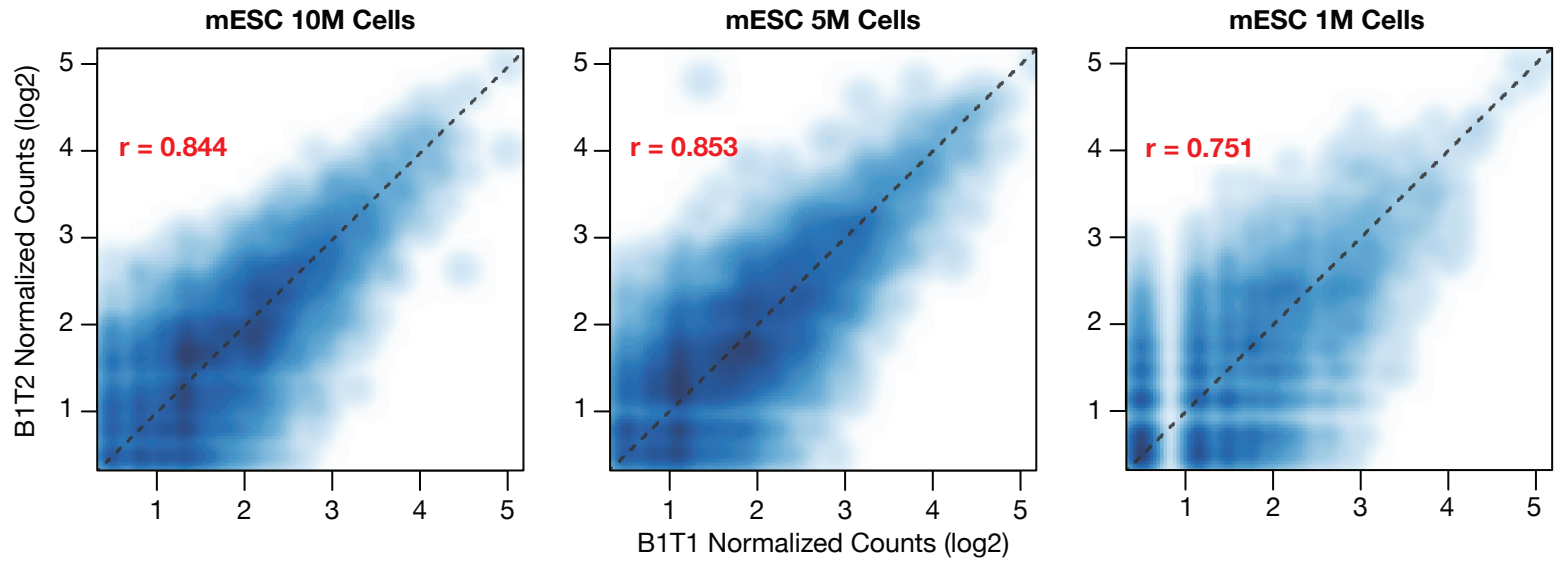

Supplement: NIHMS872416-supplement-S__Figure_3.pdf [file NIHMS872416-supplement-S__Figure_3.pdf]

**a**

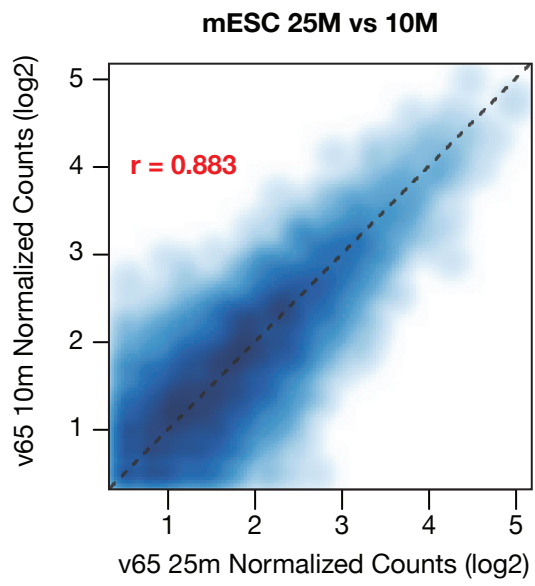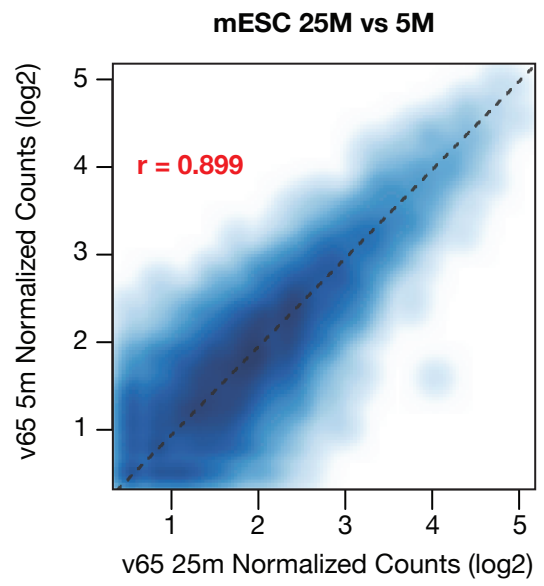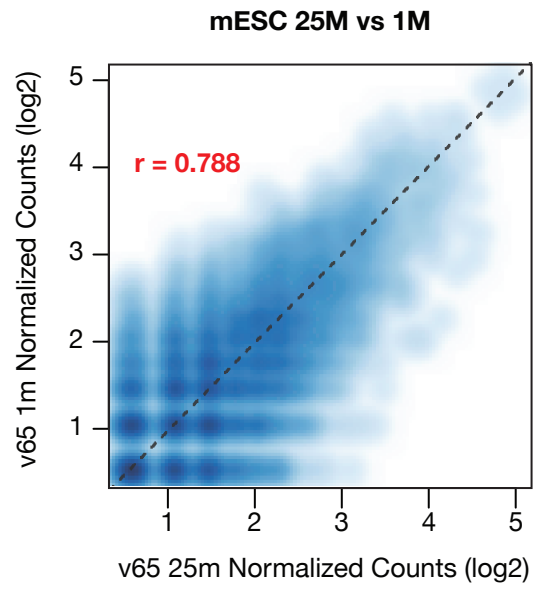

Supplement: NIHMS872416-supplement-S__Figure_4.pdf [file NIHMS872416-supplement-S__Figure_4.pdf]

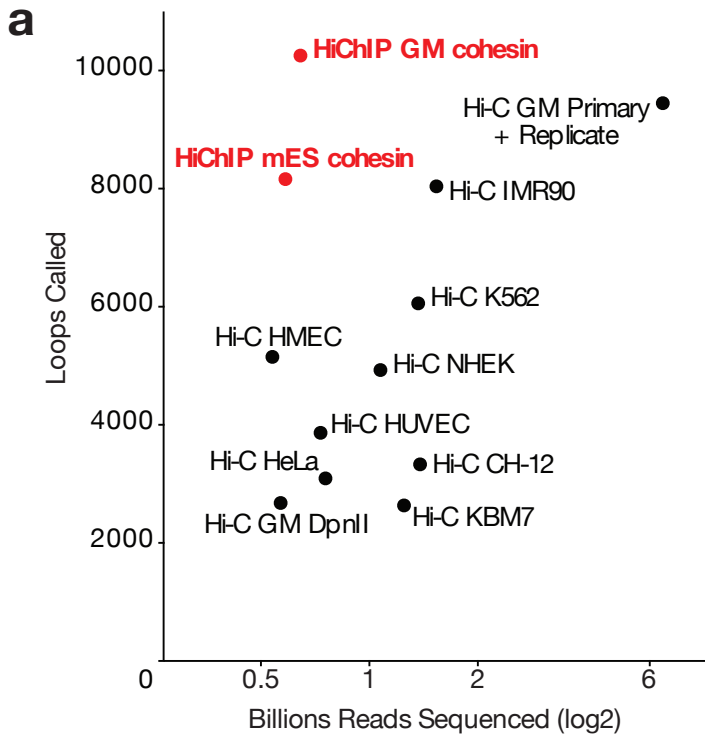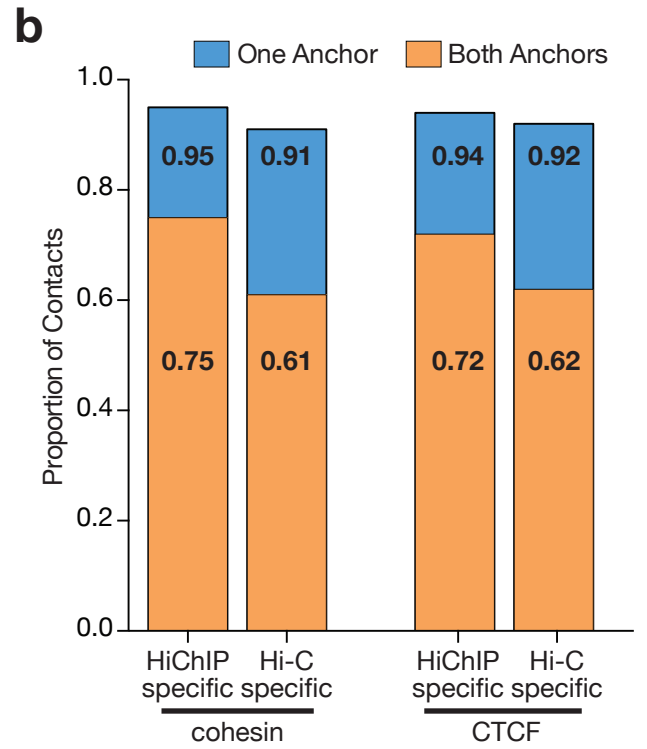

Supplement: NIHMS872416-supplement-S__Figure_5.pdf [file NIHMS872416-supplement-S__Figure_5.pdf]

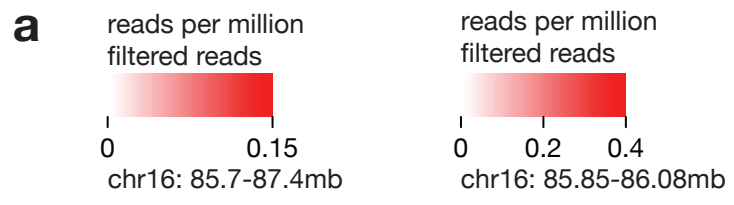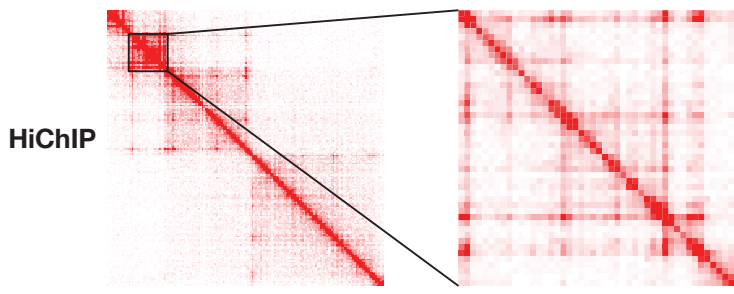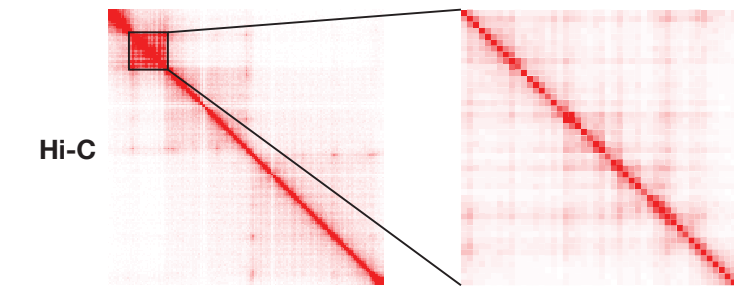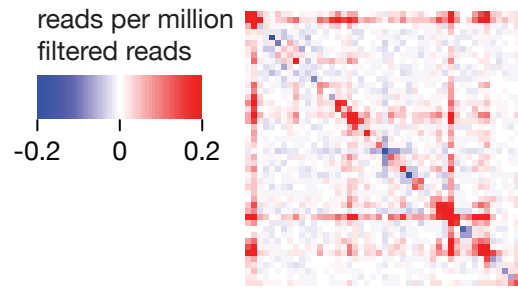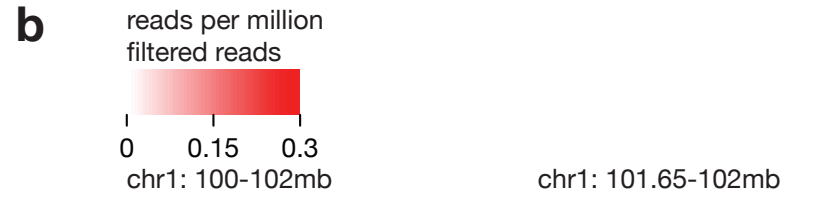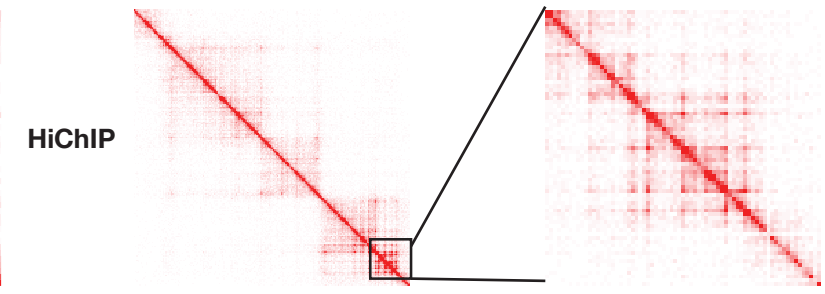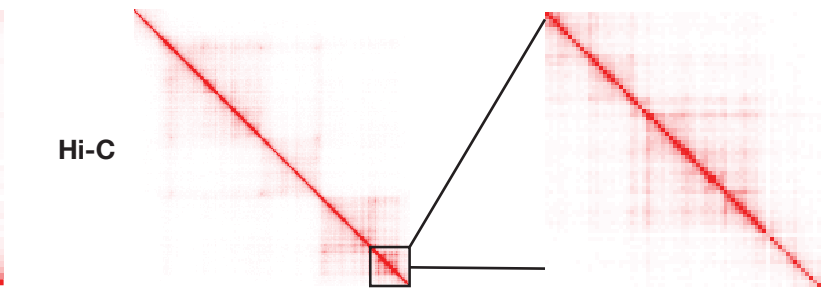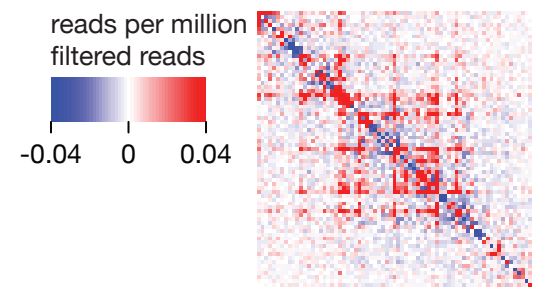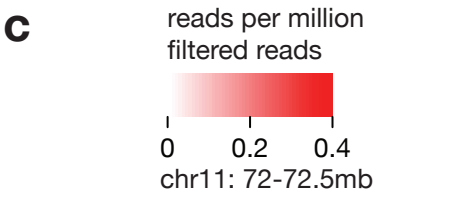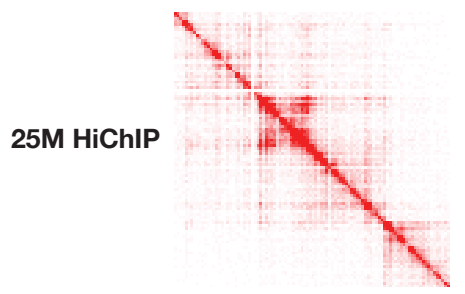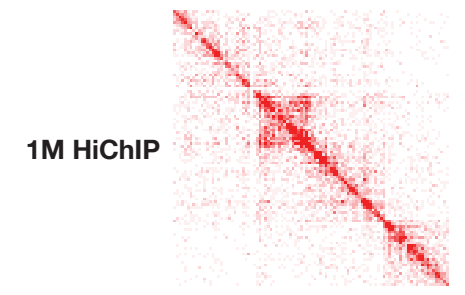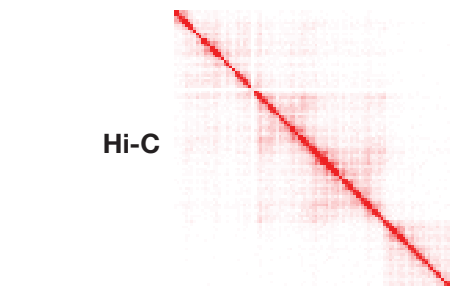

Supplement: NIHMS872416-supplement-S__Figure_6.pdf [file NIHMS872416-supplement-S__Figure_6.pdf]

**a**

Distance from downstream  
loop anchor (mb)

-1

0

1

HiChIP

-1

0

1

Hi-C

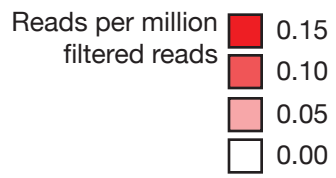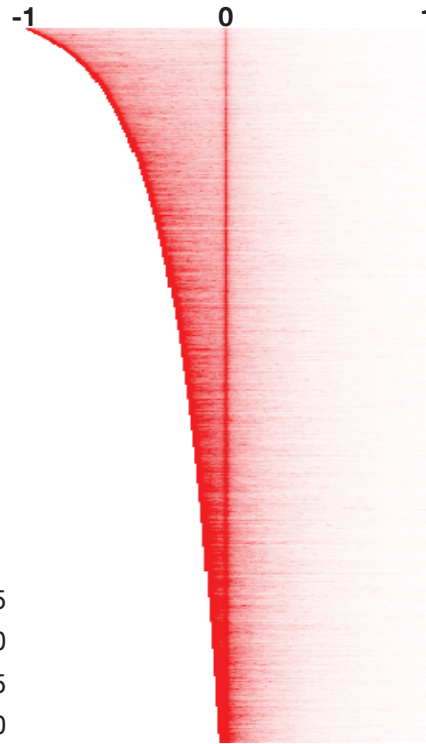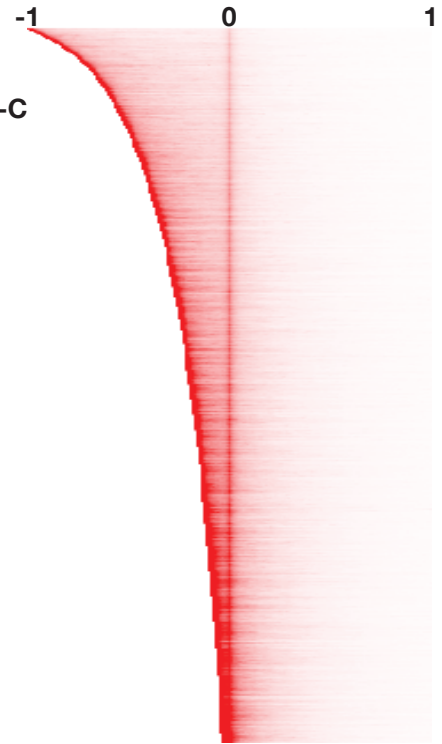

Supplement: NIHMS872416-supplement-S__Figure_7.pdf [file NIHMS872416-supplement-S__Figure_7.pdf]

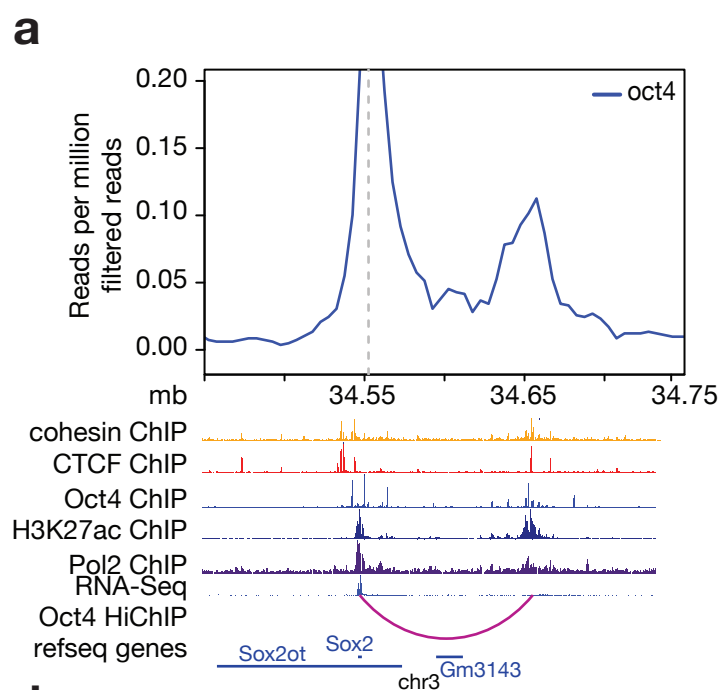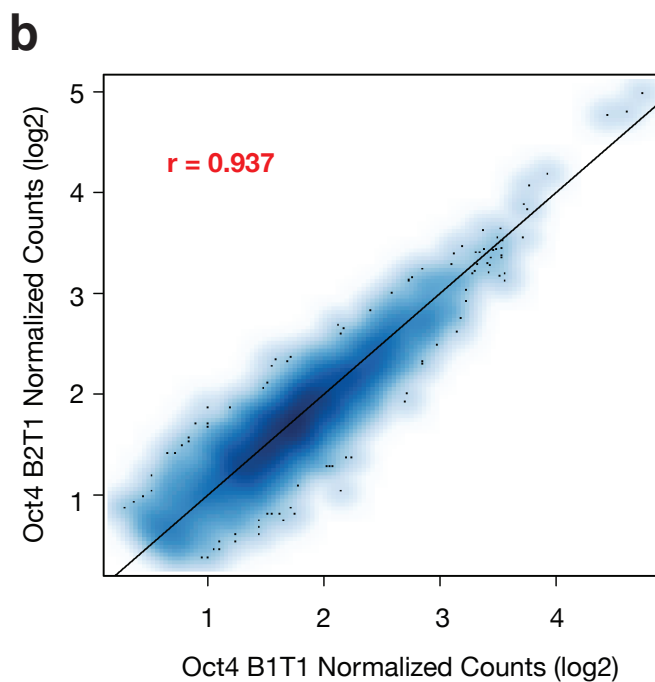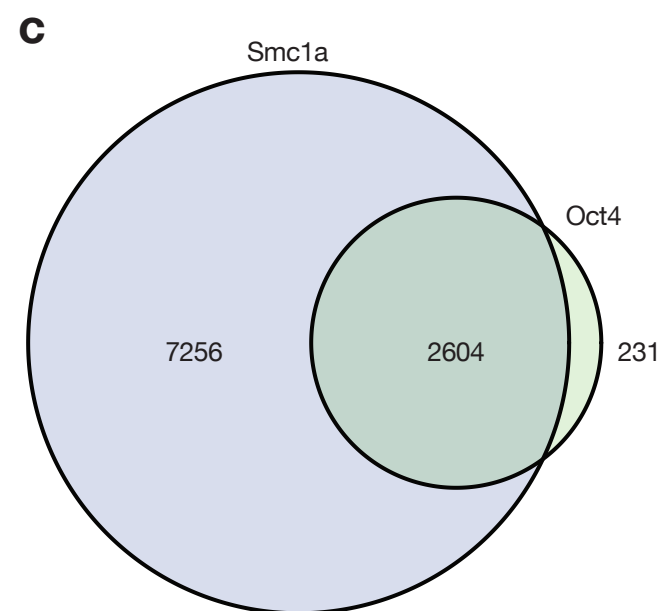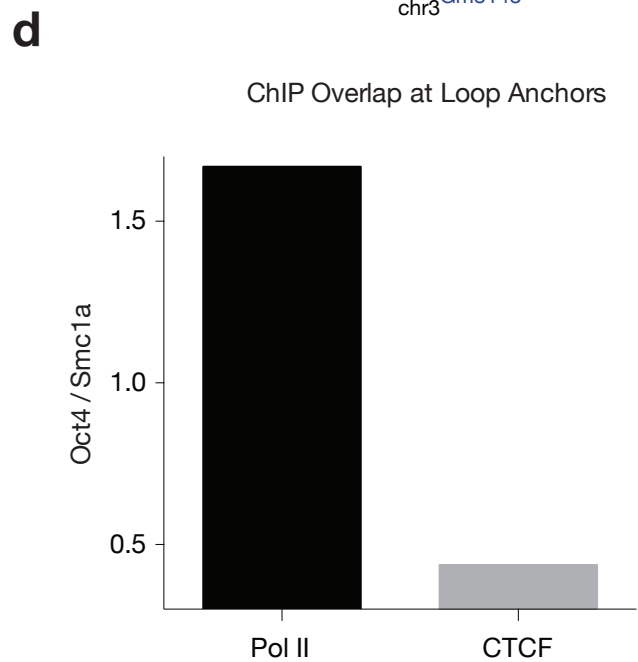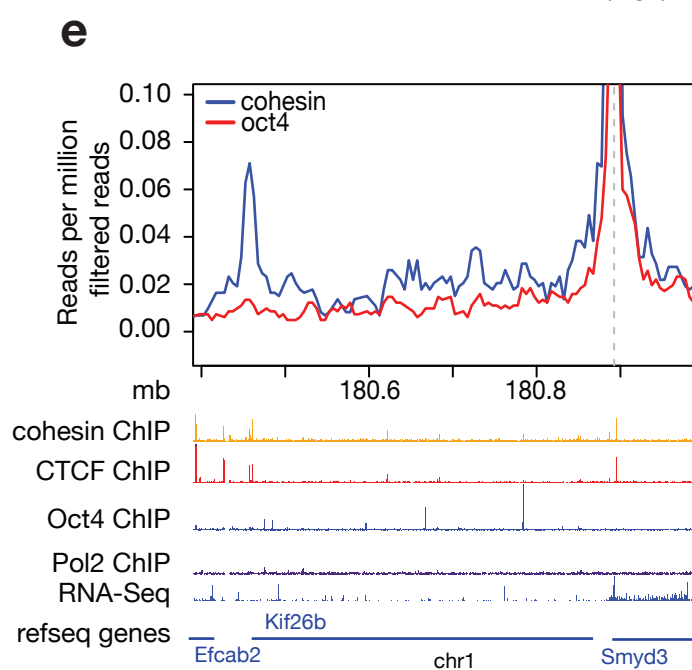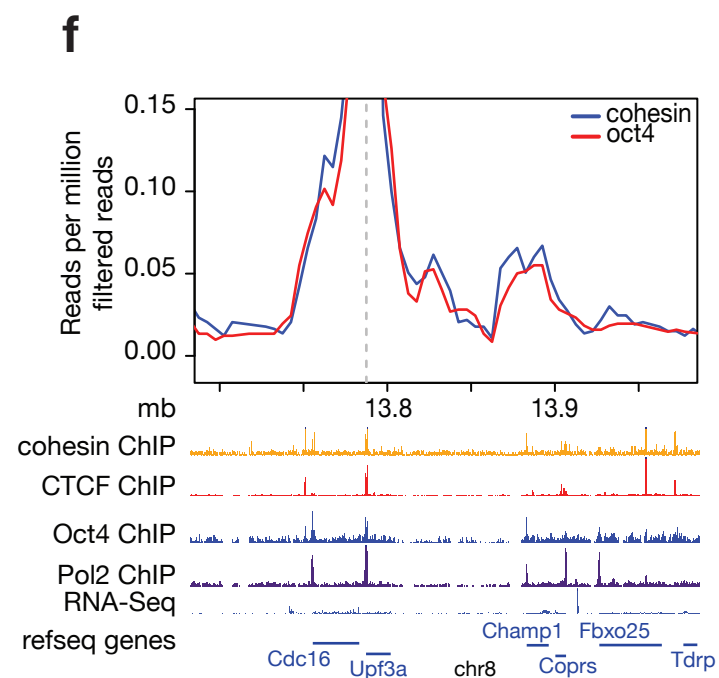

Supplement: NIHMS872416-supplement-S__Figure_8.pdf [file NIHMS872416-supplement-S__Figure_8.pdf]

**a**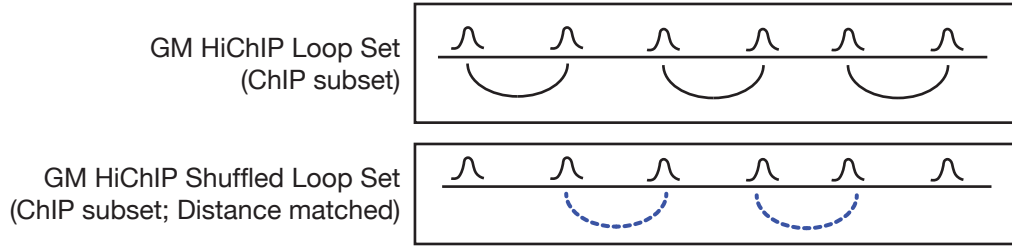**b**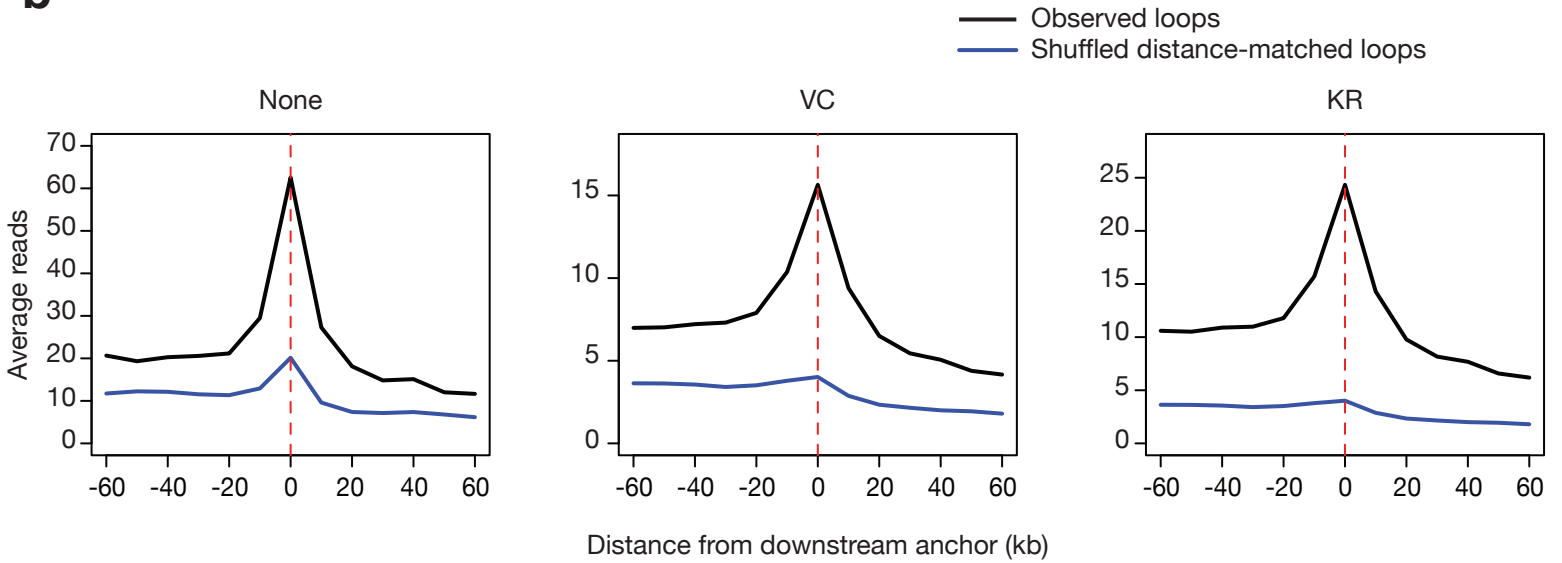

Supplement: NIHMS872416-supplement-S__Figure_9.pdf [file NIHMS872416-supplement-S__Figure_9.pdf]
